1 **Temporal correlation of elevated *PRMT1* gene expression with mushroom body neurogenesis**  
2 **during bumblebee brain development**

3

4 Cui Guan, Michaela Egertová, Clint J. Perry, Lars Chittka, Alexandra Chittka\*

5 \*Corresponding author: Alexandra Chittka ([a.chittka@qmul.ac.uk](mailto:a.chittka@qmul.ac.uk))

6

7 School of Biological and Chemical Sciences, Mile End Road

8 London, Queen Mary University of London, E1 4NS, UK

9

10

11 **Abstract**

12 Proper neural development in insects depends on the controlled proliferation and differentiation of  
13 neural precursors. In holometabolous insects, these processes must be coordinated during larval and  
14 pupal development. Recently, protein arginine methylation has come into focus as an important  
15 mechanism of controlling neural stem cell proliferation and differentiation in mammals. Whether a  
16 similar mechanism is at work in insects is unknown. We investigated this possibility by determining  
17 the expression pattern of three protein arginine methyltransferase mRNAs (*PRMT1*, 4 and 5) in the  
18 developing brain of bumblebees by *in situ* hybridisation. We detected expression in neural precursors  
19 and neurons in functionally important brain areas throughout development. We found markedly higher  
20 expression of *PRMT1*, but not *PRMT4* and *PRMT5*, in regions of mushroom bodies containing  
21 dividing cells during pupal stages at the time of active neurogenesis within this brain area. At later  
22 stages of development, *PRMT1* expression levels were found to be uniform and did not correlate with  
23 actively dividing cells. Our study suggests a role for PRMT1 in regulating neural precursor divisions  
24 in the mushroom bodies of bumblebees during the period of neurogenesis.

25

26 Key words: development, mitotically-active cells, mushroom body, PRMT

## 27 **Introduction**

28           The development of insects includes embryonic and postembryonic stages. The embryonic  
29 stage corresponds to the egg, whereas postembryonic stages of holometabolous insects comprise those  
30 of the larva, the pupa and the adult. During the development of holometabolous insects, the brain  
31 changes drastically not only in size but also in structure, especially during the larval and pupal stages  
32 [1]. Prominent structures of the insect brain are the optic lobes (visual system), antennal lobes  
33 (olfactory system), the central complex (which plays an essential role in sky-compass orientation [2]  
34 and aversive colour learning in honeybees [3], and in other insects regulates a wide repertoire of  
35 behaviours including locomotion, stridulation, spatial orientation and spatial memory [4, 5]), and  
36 higher order centres that coordinate sensory integration called the mushroom bodies (MBs) [6-8]. The  
37 mushroom bodies, thought to be an analogue of the mammalian hippocampus, are paired brain  
38 structures responsible for learning and memory functions in insects [9, 10]. In the adult brain, each  
39 mushroom body consists of two cap-like structures, called calyces [11], comprised of the dendrites of  
40 a large number of densely packed neurons, termed Kenyon cells [1, 11, 12]. The cell bodies of most  
41 Kenyon cells are enclosed by the calyces, while few are on the sides of or underneath the calyces [1,  
42 11, 12].

43           During development of honeybees, neuroblasts located at the centre of the cups of the calyces  
44 (neuroblast clustered regions, termed proliferative regions), divide and produce Kenyon cells [1, 13,  
45 14]. The neuroblasts begin their division from the first larval instar stage (four days from egg laying),  
46 continuing until the mid-late pupal stage (approximately five days from pupation, 16 days from egg  
47 laying) [1].

48           The first described mechanism for neural precursor divisions in insects involves so called  
49 Type I neuroblasts. These neuroblasts divide asymmetrically to proliferate and produce a ganglion  
50 mother cell (GMC) which undergoes a single symmetric division to produce two neurons [1]. An  
51 additional type of neuroblast (type II NBs) has been identified in *Drosophila* [15]. Type II NBs divide  
52 asymmetrically to renew themselves and generate a transit amplifying intermediate neural progenitor  
53 that continues to renew itself three to five times to generate more transit amplifying intermediate

54 neural progenitors and a GMC that divides again to generate two neurons [15]. There are 90 type I  
55 and eight type II NBs found in each *Drosophila* brain lobe [15], where type II NBs produce many  
56 neurons for important neuropile substructures of the brain, in particular the central complex [15].

57       Type I neuroblast divisions occur during the development of the honeybee brain [1]. It is  
58 unclear whether type II neuroblasts are present in bees. Farris *et al.* [1] reported no evidence in  
59 honeybee mushroom bodies of neuroblast divisions other than the classic type I division pattern.  
60 However, this work was published before type II NBs were identified, leaving open the possibility  
61 that such cells might exist in bees. In this study we focus on the mushroom bodies. In *Drosophila* the  
62 neuroblasts that form the mushroom body do not undergo type II neuroblast divisions during  
63 embryonic stage, as judged by a lack of cells in this lineage that express markers of transit amplifying  
64 intermediate neural progenitors [16].

65       In the developing bee, neural precursor division and neurogenesis causes a dramatic change in  
66 the cytoarchitecture of mushroom bodies [1]. During the larval and pre-pupal stages the neuropils  
67 begin to form with the peduncular neuropil first observable during the third larval instar (six days  
68 from egg laying) and the calycal neuropils first seen during the pre-pupal stage (10 to 11 days from  
69 egg laying) [13]. Normally at pupal day 5, neurogenesis in the mushroom bodies of bees cease [1].  
70 However, the growth of the mushroom body neuropil does not cease but continues throughout adult  
71 life [17]. The developmental stages of worker honeybees and bumblebees are shown in Fig. 1A, and a  
72 description of previously-reported patterns of cell division, differentiation and apoptosis during the  
73 development of mushroom bodies of honeybees is shown in Fig. 1B.

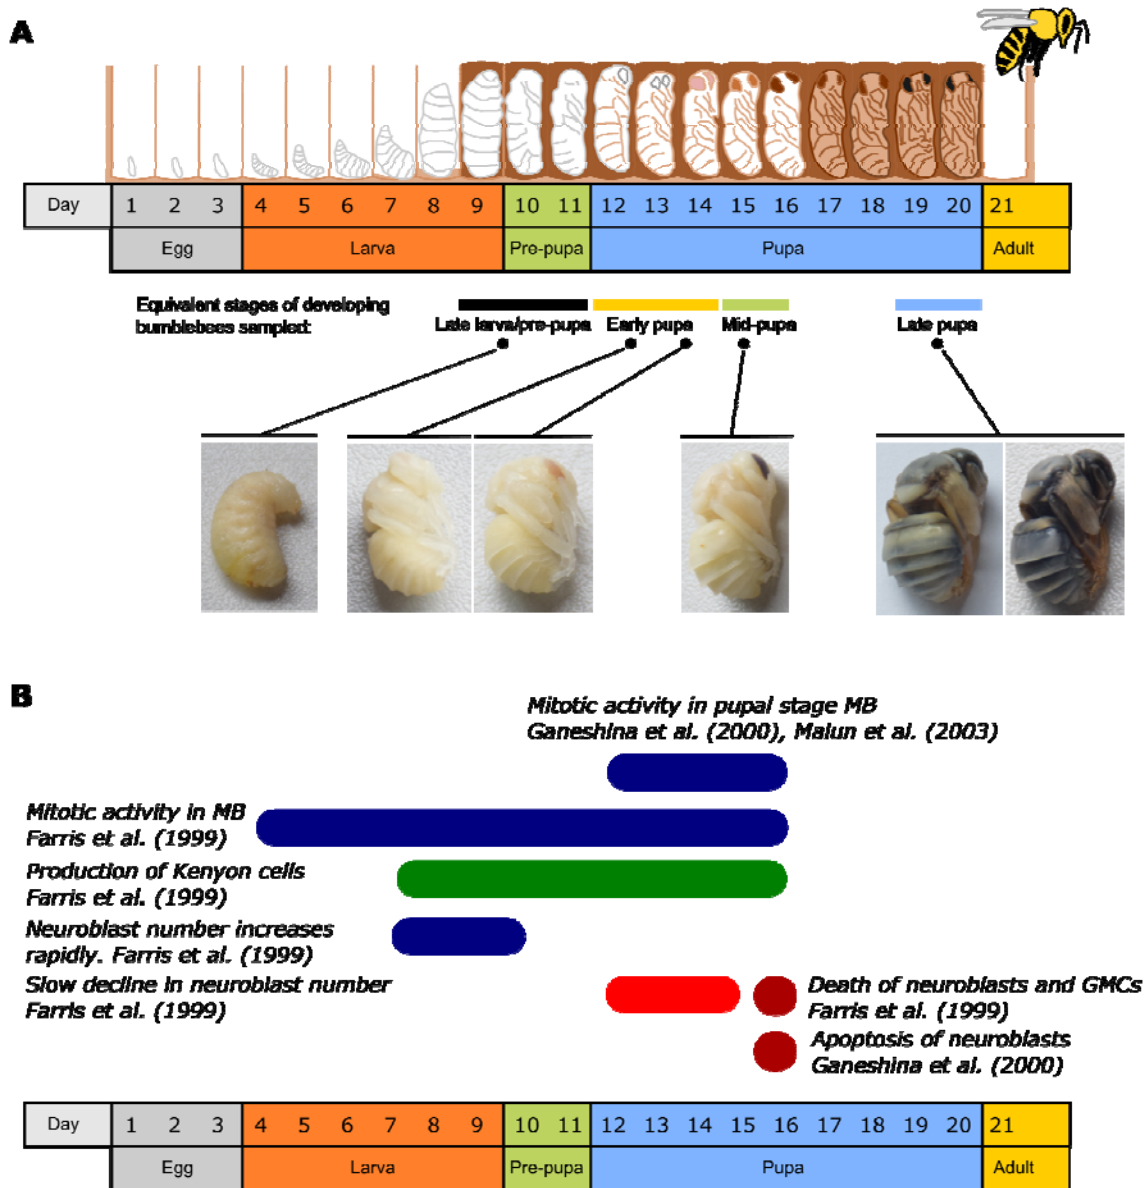

74  
75

76 **Fig. 1** Developmental stages of honeybees and bumblebees and the corresponding changes in the composition of  
 77 **developing mushroom bodies (MBs).** A) Schematic diagram of different developmental stages of honeybee and the  
 78 equivalent stages of bumblebees investigated in this study. Given the highly close genetic and anatomic similarity between  
 79 honeybees and bumblebees, eye colour and head pigmentation were used in the present study as markers to determine the  
 80 equivalent bumblebee developmental stages to those stated in honeybee literature. Late larva/Pre-pupa in bumblebees  
 81 correspond to days 9-11 of honeybee development; early pupa in bumblebees correspond to days 12-14 of honeybee  
 82 developmental; mid-pupa in bumblebees corresponds to approximately day 15-16 honeybee developmental stage; the late  
 83 bumblebee pupa corresponds to day 19-20 of honeybee development. B) Schematic diagram of reported cell division,  
 84 differentiation and apoptosis during the development of mushroom bodies of honeybees. Farris *et al.* showed that there was

85 mitotic activity in the mushroom bodies from day 4 until day 16 of development; newly produced Kenyon cells were visible  
86 from day 7 until day 16 of development; the number of mushroom body neuroblasts increases drastically from day 7 until  
87 day 9 of development, and slowly declines from day 12 to day 15 of development; cell death of neuroblasts and ganglion  
88 mother cells (GMCs) started on day 15 and was evident on day 16 of development [1]. From day 12 to day 16 of  
89 development, Ganeshina *et al.* [18] and Malun *et al.* [19] detected mitotic activity of cells in mushroom bodies. Ganeshina  
90 *et al.* showed that there were apoptotic cells from day 15 of development onwards and extensive apoptosis was observed on  
91 day 16 of development [18].

92         These neuroanatomical changes during bee development are well defined, but less is known  
93 about their molecular basis. In contrast, in *Drosophila*, much is known about the molecular  
94 mechanisms that control the division of neuroblasts. For example, during type I neuroblast division,  
95 the Par complex (aPKC (Atypical Protein Kinase C), Bazooka/Par3, Partitioning defective 6) forms a  
96 polarity axis in NBs [15]. The complex accumulates and segregates to the apical side. This directs the  
97 localisation of three cell fate determinants (Numb, Pros and Brat) to the opposite (basal) cortex [15].  
98 After asymmetric division, these factors specifically segregate to the GMC, where they inhibit self-  
99 renewal and promote differentiation [15].

100         Post-translational modifications of proteins play an important role in modulating their  
101 function, their interactions with various partners as well as their subcellular localisation. Different  
102 types of post-translational modifications thus fine-tune cellular responses to various environmental  
103 cues during development, allowing for stage-specific responses. Recent work has highlighted the  
104 importance of protein arginine methyltransferases (PRMTs) in regulating the development of the  
105 nervous system in vertebrates. PRMTs are a family of enzymes that catalyse the transfer of a methyl  
106 group from S-adenosylmethionine (SAM) to the guanidine nitrogen atoms of arginine [20, 21]  
107 leading to the generation of monomethyl, symmetric or asymmetric dimethyl arginines (MMA,  
108 SDMA and ADMA, respectively). ADMA is mediated by type I PRMTs, which include PRMT1, 2, 3,  
109 4, 6 and 8, whereas SMDA is mediated by type II PRMTs, represented by PRMT5 and 9 [22, 23].  
110 PRMTs control a multitude of essential cellular processes, e.g., cell proliferation and differentiation in  
111 all tissues during development, through the modification of protein substrates [23-30]. Their roles in  
112 controlling neural development in vertebrates are beginning to be elucidated [31-34]. For example,

113 PRMT1 has been implicated in neurite outgrowth in human neuro2a cells during neuronal  
114 differentiation [35] and in the switch between epidermal and neural fate in *Xenopus* embryos [36].  
115 Interestingly, enzymatic activity of PRMT1 is upregulated by the rodent antiproliferative protein  
116 TIS21 [37], a marker of all neural progenitors that are undergoing neurogenic divisions during  
117 mammalian development [38-40]. CARM1/PRMT4 regulates proliferation of PC12 cells, the cell line  
118 which is responsive to the proliferation-inducing Epidermal Growth Factor (EGF) and the  
119 differentiation-inducing Nerve Growth Factor (NGF) [41], by methylating the RNA binding protein  
120 HuD and controlling the choice of cell-cycle specific mRNAs bound by HuD in this manner [42].  
121 PRMT5 maintains neural stem cell proliferation during early stages of development and its activity is  
122 downregulated by NGF in PC12 cells [43, 44]. Moreover, neural stem cell specific ablation of *PRMT5*  
123 in mice revealed its role in maintaining neural stem cell homeostasis during development [45].

124 Together, the emerging information underscores the importance of protein arginine  
125 methylation during neural development. However, very little is known about the role that PRMTs may  
126 play in insect neural development, prompting us to begin investigating their potential roles during  
127 development of the bumblebee central nervous system (CNS). Here we present the first study of the  
128 expression of *PRMT* genes during bumblebee brain development. We focus on determining the  
129 expression pattern of *PRMT1*, *PRMT4* and *PRMT5* in the brains of bumblebees at different  
130 developmental stages by *in situ* hybridisation. These genes were chosen because previous studies  
131 showed that they are important in the vertebrate nervous system development and their sequences are  
132 conserved across different species, from *Drosophila melanogaster* to mammals [22, 23, 35, 36, 42-44].  
133 We show that all three enzymes are expressed in cell bodies in functionally important brain areas,  
134 such as the mushroom bodies, throughout development.

135 Our results reveal that there is a spatiotemporal correlation between levels of *PRMT1*  
136 expression and the presence of mitotically active cells in the developing mushroom body, at the time  
137 of active neurogenesis, and suggest a possible role for PRMT1 in the regulation of  
138 neuroblast/ganglion mother cell divisions.

139

## 140 **Materials and Methods**

### 141 **Collection of bees**

142 Bees from three *Bombus terrestris* colonies (Biobest Belgium N.V., Westerlo, Belgium) were  
143 maintained at Queen Mary University of London (Mile End campus). Pollen (approximately 7 g) and  
144 30% sucrose (w/v) were given *ad libitum* to the hive every day during the experiment. The life cycle  
145 of a bee consists of four major stages: egg, larva, pupa, and finally the adult. Generally speaking, for a  
146 *Bombus terrestris* worker bee, eggs hatch into larvae after 4-6 days [46]. The larval stage lasts for 10-  
147 20 days before it pupates. Then the larva moults and spins a silken cocoon around its body. After  
148 about two weeks as a pupa, an adult worker emerges [46]. Six developmental stages of bees were  
149 collected. These were late larvae/pre-pupae (with the larva ceasing any movements and the cocoon  
150 being formed), early-pupae (white/pink eye pupae), mid-pupae (brown eye pupae), late pupae (the  
151 cocoon contains a black body and head), two-day old workers, and seven to ten-day old workers.  
152 Given the highly close genetic and anatomic similarity between honeybees and bumblebees [47, 48],  
153 eye colour and head pigmentation were used in the present study as markers to sample the pupal  
154 staged bees based on the honeybee literature (Fig. 1A) [49]. Two-day old workers were sampled  
155 because this is the earliest age a worker bee can start to forage [50]. Furthermore, two-day old worker  
156 honeybees without flight experience go through a drastic outgrowth of Kenyon cell dendrites in  
157 mushroom bodies [17]. Seven to ten-day old workers were sampled because this range was the  
158 average age for a bumblebee to start to forage according to the present experimental observations. In  
159 honeybees, foraging bees have more dendritic spines in the mushroom body in comparison to nursing  
160 bees, which are normally younger than foraging bees [17]. All the bees were kept inside the nest  
161 without any flight experience, to remove the possibility of flight experience causing changes in the  
162 brain of the bees that were sampled.

163 All bees were gently removed from the nest using large tweezers and then placed over ice to  
164 anaesthetize them before dissection. The entire heads of late larvae/pre-pupae and early-pupae were  
165 removed and placed into 4% paraformaldehyde (PFA) in phosphate-buffered saline (PBS: 0.2562g  
166  $\text{NaH}_2\text{PO}_4 \cdot \text{H}_2\text{O}$ , 1.495g  $\text{Na}_2\text{HPO}_4 \cdot 2\text{H}_2\text{O}$ , 8.766g  $\text{NaCl}$  per liter, pH 7.2-7.4) for fixation at 4 °C



167 overnight. For mid-pupae, late pupae and adults, the heads were removed and the brains were  
168 immediately dissected out from the head capsule under cold 4% PFA in PBS. Subsequently, the brains  
169 of mid-pupae, late pupae and adults were put in fixative 4% PFA in PBS at 4 °C overnight. The next  
170 day the tissue was washed in PBS three times (10 min each) before being transferred to 10%  
171 sucrose/PBS and 20% sucrose/PBS for 4 hours each at room temperature and 30% sucrose/PBS  
172 overnight at 4 °C for cryoprotection. On the next day, the tissue was embedded in optimal cutting  
173 temperature compound (O.C.T; Agar Scientific Ltd, UK) and rapidly frozen on dry ice before being  
174 sectioned into 10 µm slices. Serial brain sections were alternately mounted onto positively charged  
175 SuperFrost Ultra Plus slides for later use (Fisher Scientific UK Ltd).

176

### 177 **Probe synthesis**

178 *In situ* hybridisation of bumblebee brain cryosections was conducted with digoxigenin (DIG)-  
179 labeled riboprobes. For *PRMT1*, antisense and sense probes were transcribed from a pBluescript II SK  
180 (+/-) subclone containing a 575-bp fragment from the coding DNA sequence (CDS) region (bp 539-  
181 1113; NCBI RefSeq: XM\_003395460.2) of the *PRMT1* cDNA. DNA containing the *PRMT1* fragment  
182 flanked by T3 RNA polymerase and T7 RNA polymerase sites was amplified by PCR. The antisense  
183 probe was synthesized using T3 RNA polymerase, whereas the sense probe was synthesized using T7  
184 RNA polymerase. For *PRMT4/CARMER*, antisense and sense probes were transcribed from a  
185 pcDNA3 subclone containing a 517-bp fragment from the 3'-untranslated region (bp 2364-2880;  
186 NCBI RefSeq: XM\_012313193.1) of the *PRMT4* cDNA. DNA containing the *PRMT4* fragment  
187 flanked by SP6 RNA polymerase and T7 RNA polymerase sites was amplified by PCR. The antisense  
188 probe was synthesized using SP6 RNA polymerase, whereas the sense probe was synthesized using  
189 T7 RNA polymerase. For *PRMT5*, antisense and sense probes were synthesized from a 463-bp  
190 fragment from the CDS region (bp 1626-2088; NCBI RefSeq: XM\_003396560.2) of the *PRMT5*  
191 cDNA pcDNA3 clone. DNA containing the *PRMT5* fragment flanked by SP6 RNA polymerase and  
192 T7 RNA polymerase sites was amplified by PCR. The antisense probe was synthesized using SP6  
193 RNA polymerase with a PCR amplified fragment from the plasmid, whereas the sense probe was

194 synthesized using T7 RNA polymerase. A DIG RNA Labelling Kit (Roche, UK) was used to  
195 synthesize the DIG-labeled riboprobes according to the manufacturer's instructions.

196

### 197 ***In situ* hybridisation (ISH)**

198 Frozen horizontal brain sections were air dried for two hours and then washed twice for 7  
199 minutes in PBS before being post-fixed in 4% PFA at room temperature for 20 minutes. This was  
200 followed by three 5-minute washes with PBS containing 0.1% Tween20 (Sigma-Aldrich, UK) (PBST).  
201 Slides were then incubated at 37°C for 7 minutes in 20 mg/mL Proteinase K (Roche, UK) in  
202 Tris/EDTA (6.25 mM EDTA, 50 mM Tris, pH 7.5) to increase probe penetration and then were put  
203 into 4% PFA for 5 minutes to prevent the sections from falling apart. The sections were then washed  
204 in PBST three times (5 minutes per time), and acetylated in an acetylate solution (0.1M  
205 Triethanolamine (TEA), 0.25% acetic anhydride, 0.175% acetic acid) for 10 minutes in order to  
206 remove the charge on the sections and eliminate the background binding of the probes later. This was  
207 followed by two 5-minute PBST washes and one 5-minute wash in 5× saline sodium citrate (SCC;  
208 Na-citrate 0.075 M, NaCl 0.75 M, pH 7). Sections were then incubated in pre-hybridisation buffer (50  
209 µg/mL yeast RNA, 50% Formamide, 20% 20×SSC, 50 µg/mL Heparin and 0.1% Tween 20) for two  
210 hours at room temperature. Subsequently, hybridisation was performed by incubating the sections  
211 overnight at 65 °C with hybridisation buffer, which contained a DIG-labeled ribo-probe of either  
212 antisense or sense of *PRMT1*, 4 and 5 at a concentration of 1 µg/ml. On the following day, slides were  
213 equilibrated in 5×SSC once for 20 minutes and 0.2× SSC for 40 minutes twice at 65 °C. This was  
214 followed by a 10 minute 0.2× SSC wash and a 10-minute buffer B1 (5M NaCl, 1M Tris, pH 7.5) wash  
215 at room temperature. Slides were then blocked in buffer B1 with 5% goat serum for two hours at room  
216 temperature, and incubated with Anti-Digoxigenin-AP Fab Fragments (Roche, UK) antibody diluted  
217 1:3000 in buffer B1 with 2.5% goat serum overnight at 4°C. On the next day, the slides were washed  
218 with buffer B1 three times and once with buffer B3 (1M MgCl<sub>2</sub>, 5M NaCl and 1M Tris, pH 9.5).  
219 Products were visualized using NBT/BCIP reagent (Roche, UK) according to the manufacturer's  
220 instructions in buffer B3 with 0.1% of Tween 20 (Sigma-Aldrich, UK) in a dark and humidified

221 chamber. The staining was detected by the presence of dark purple precipitate. Conditions for colour  
222 development were kept identical for all experiments performed with each sense and antisense probe.  
223 Colour development was monitored by using a LEICA DMR4 microscope (LEICA, Germany) every  
224 half an hour to determine when to stop the reaction. Reactions were stopped by putting the slides in  
225 deionised water when a moderate intensity of staining was achieved.

226 Slides were then mounted. For the mounting procedure, the slides were washed with  
227 deionised water three times (5 minutes each), and subsequently dried for about 45 minutes at 37 °C  
228 until they were totally dry before being put in 100% ethanol to dehydrate twice for 10 seconds, and  
229 equilibrated in histo-clear (National Diagnostics, UK) twice (7 minutes each). Histomount (National  
230 Diagnostics, UK) was then added to the slides before cover slips were added. Following this, the  
231 slides were allowed to dry and stored in a dark box.

232 Sections were photographed with a QIMAGING QIClick™ CCD Colour Camera linked to a  
233 DMRA2 light microscope (LEICA, Germany) using image analysis software (Volocity® software,  
234 v.6.3.1, PerkinElmer, USA) running on an iMac (27-inch, Version 10.10, Late 2013 model with OS X  
235 Yosemite). Photographs of half brain sections were collected (the other half of the brain showed  
236 symmetrical staining). Adjacent sections from the same brain were used for sense and antisense  
237 probes to ensure the specificity of the staining with antisense probes.

238

### 239 **Quantification of ISH data for *PRMT1***

240 To quantify relative intensities of mRNA expression, ImageJ was used to determine the  
241 optical density of selected regions as a measure of gene expression [51]. Thirty areas from the  
242 mushroom bodies, optic lobes, antennal lobes and background (no *PRMT1* ISH staining) neuropil  
243 areas were chosen for analysis. The goal was to choose areas that were from equivalent anatomical  
244 areas across the different sections and time-points. In figure 5A and B, areas 1-4 are the central  
245 mushroom bodies, areas 5-12 are the peripheral mushroom body, areas 13-18 are areas alongside the  
246 antennal lobe, and areas 19-24 are within the optic lobe area. In addition, a high intensity sub-region

247 of the antennal lobe (area 13) was selected because in the early pupal stage this area repeatedly  
248 showed darker staining (we termed this the ‘antennal lobe high intensity region’). Areas 25-30, within  
249 the neuropil region that lacked detectable staining, were chosen as the background areas. An example  
250 of the areas chosen are shown in Fig. 5A (original image of a bee section) and B (image showing the  
251 selected regions used for quantification). Areas high in noise (such as a folded section area or non-  
252 removable dirt on the cover slip) were avoided when choosing the areas of interest.

253 ImageJ was used to measure the optical density of the region of interest (ROI) [51]. The  
254 average optical density of the background areas was subtracted from each ROI to normalize the  
255 intensity of the staining in each section. Five grouped areas (mushroom body central areas, mushroom  
256 body peripheral areas, antennal lobe high intensity area in early pupal stage, antennal lobe area and  
257 optic lobe area) were compared (see, for example, Fig. 5B).

258

## 259 **Immunohistochemistry**

260 Tissue sections which were hybridized with the *PRMT1* specific antisense riboprobe were  
261 then used for immunohistochemistry. The slides were washed with PBS and blocked in 5% bovine  
262 serum albumin (BSA; Sigma-Aldrich, UK) /PBS-0.1% Triton X-100 (Sigma-Aldrich, UK) (PBS-Tx  
263 containing 5% BSA) at room temperature for 1 hour, and incubated with 5% BSA/PBS-Tx containing  
264 1:500-fold diluted anti-Phospho-Histone H3 [pSer10] antibody (PH3S10; produced in rabbit; Sigma-  
265 Aldrich, UK) at 4 °C overnight. The next day the slides were washed three times in PBS (10 minutes  
266 for each wash) and incubated with a Cy2-conjugated anti-rabbit IgG secondary antibody at 1:500  
267 dilution (Jackson ImmunoResearch, UK) and Hoechst 33258 (1 µg/ml; Sigma-Aldrich, UK) for 2 h.  
268 This was followed by three washes with PBS-Tx (10 minutes each). Images were analysed using a  
269 fluorescence microscope (LEICA DMRA2, LEICA, Germany) and photographed with a digital  
270 camera (HAMAMATSU, ORCA-ER, C 4742-80, HAMAMATSU, Japan). The photographs were  
271 saved in Volocity software (v.6.3.1, PerkinElmer, USA) running on an iMac (27-inch, Version 10.10,  
272 Late 2013 model with OS X Yosemite, Apple, USA).

273 **Correlation analysis of *PRMT1* expression with mitotically-active cells and cell density within**  
274 **mushroom bodies**

275 The optical density of staining associated *PRMT1* mRNA expression was compared with the  
276 proportion of mitotically active cells measured as the number of anti-PH3S10 positive nuclei divided  
277 by the total number of nuclei (identified by Hoechst staining) in each selected region of the mushroom  
278 bodies.

279 To do this, the ISH image was used to select five ROIs in the dark stained region (central  
280 region) of the mushroom body and five ROIs in the left and right-side regions (peripheral regions) of  
281 the mushroom body to analyse. Two regions of background in the non-stained neuropil were also  
282 chosen to normalise the optical density of ISH image. The ISH channel was used to select these  
283 regions to avoid any bias involved in selecting the mitotic marker stained regions. The optical density  
284 of each selected region and the region size were measured using Fiji ImageJ software [51]. The  
285 corresponding numbers of nuclei stained with Hoechst and numbers of PH3S10-expressing cells in  
286 the same selected regions were counted. An example of how ROIs were selected is shown in  
287 Supplemental Fig. S1.

288 Spearman's rank correlation coefficient analysis was used to analyse the correlation between  
289 the expression level of *PRMT1* (measured as optical density normalised by the subtraction of the  
290 background optical density) and proportion of mitotically active cells (the number of PH3S10-positive  
291 dividing nuclei divided by the total number of nuclei) in each selected region for three developmental  
292 stages of bumblebees (late larvae/pre-pupae, early-pupae and mid-pupae).

293 Furthermore, the Hoechst stained image and the ISH image was analysed to gain a better  
294 understanding of the relationship between the cell density (*measured as the number of nuclei divided*  
295 *by the size of the area*) and the expression level of *PRMT1* in the same region. Spearman's rank  
296 correlation coefficient analysis was also used to determine whether there is a spatio-temporal  
297 correlation between *PRMT1* mRNA expression level and the cell density during the three stages of  
298 bumblebee development. R statistical software version 3.4.0 was used in the analyses above [52].

## 299 **Results**

### 300 ***In situ* hybridisation analysis of *PRMT* gene expression in pupal and adult bumblebee brains**

301 To gain insights into potential roles of PRMTs in bumblebee neural development, we  
302 performed *in situ* hybridisation to determine the mRNA expression pattern of *PRMT1*, *PRMT4* and  
303 *PRMT5* in the developing brain of bumblebees. We selected the late larval/pre-pupal, early-pupal,  
304 mid-pupal, late pupal, two-day old worker, and 7 to 10-day old worker stages to investigate mRNA  
305 expression of *PRMT1*, 4 and 5, since the first three developmental stages are marked by active  
306 neurogenesis in the mushroom body, while it ceases after the mid-pupal stage [1].

307 Our results show that all three genes are expressed throughout pupal development and adult  
308 stages in cell bodies of neural precursors and nerve cells in the mushroom bodies, antennal lobes, and  
309 optic lobes (Fig. 2, 3 and 4). Interestingly, we observed that the expression of all *PRMTs* was much  
310 more restricted in the adult brain (Fig. 2, 3 and 4 A, B, and C) than their broader expression in the  
311 pupal brain (Fig. 2, 3 and 4 D, E, and F), suggesting a role for these enzymes in pupal brain  
312 development. Examples of images of sections which were hybridized with sense controls are shown in  
313 the inset panels of Fig. 2F, 3F and 4F, confirming the specificity of our ISH probes.

314

#### 315 *PRMT1* mRNA expression

316 The expression level of *PRMT1* mRNA at the developmental stages of late larvae/pre-pupae,  
317 early-pupae and mid-pupae was higher in the mushroom body central regions, which are thought to  
318 contain dividing neural precursors (arrows in Fig. 2), than in the mushroom body peripheral regions,  
319 which are thought to contain differentiated neurons, at least in honeybees (Fig. 2A, B and C) [1, 13].  
320 Previous studies in honeybees have shown that neuroblast clusters localize at the central region of  
321 mushroom bodies where they divide before they differentiate and migrate to the periphery of the  
322 neuroblast clusters [1, 13]. The newly born post-mitotic neurons, called Kenyon cells, are located at  
323 the periphery of the neuroblast clusters [1, 13]. The stronger localized expression of *PRMT1* mRNA

324 in central mushroom body areas during earlier stages of development contrasted with its uniform  
325 expression pattern in the late pupal and adult stages (Fig. 2D, E and F).

326

327 *PRMT4 and PRMT5 mRNA expression*

328 In contrast to *PRMT1*, *PRMT4* and *PRMT5* mRNAs were more uniformly expressed across  
329 all stages (Fig. 3 and 4) except for the early pupal stage (Fig. 3B and Fig.4B). There was a slightly  
330 higher expression level of *PRMT4* and *PRMT5* in central mushroom bodies at early pupal stage (Fig.  
331 3B and Fig. 4B), although this was less distinct than the markedly elevated level of expression  
332 observed for *PRMT1*. No significant differences in expression levels of either *PRMT4* or *5* were  
333 detected in any of the sub-regions of the mushroom bodies, optic lobes or antennal lobes at other  
334 developmental stages investigated (*PRMT4*: Fig. 3A and C-F, *PRMT5*: Fig. 4A and C-F).

335



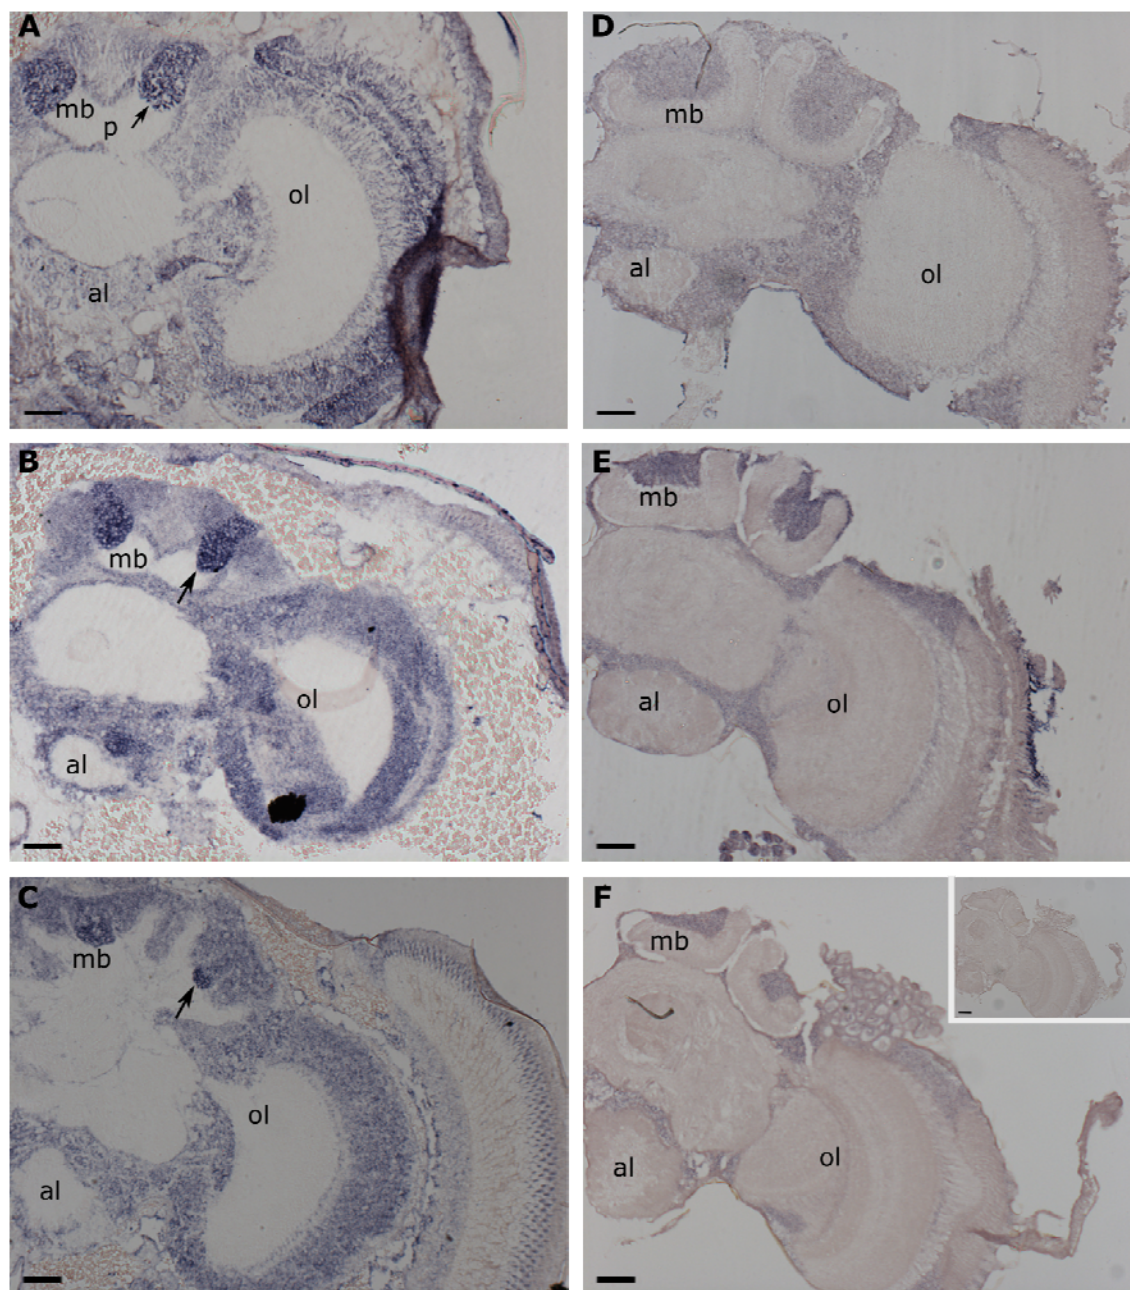

336

337 **Fig. 2** *In situ* hybridisation of *PRMT1* in the frontal half section of the brain of A) late larva/pre-pupa; B) early pupa;

338 C) mid-pupa; D) late pupa; E) two-day old worker and F) 7 to 10-day old worker. Three biological replicates were

339 analysed for each stage. Arrow: neural precursor dividing regions according to honeybee literature. mb: mushroom body; ol:

340 antennal lobe; al: antennal lobe; p: pedunculus. F) inset panel shows sense control without signal. Scale bars: 120 µm.

341



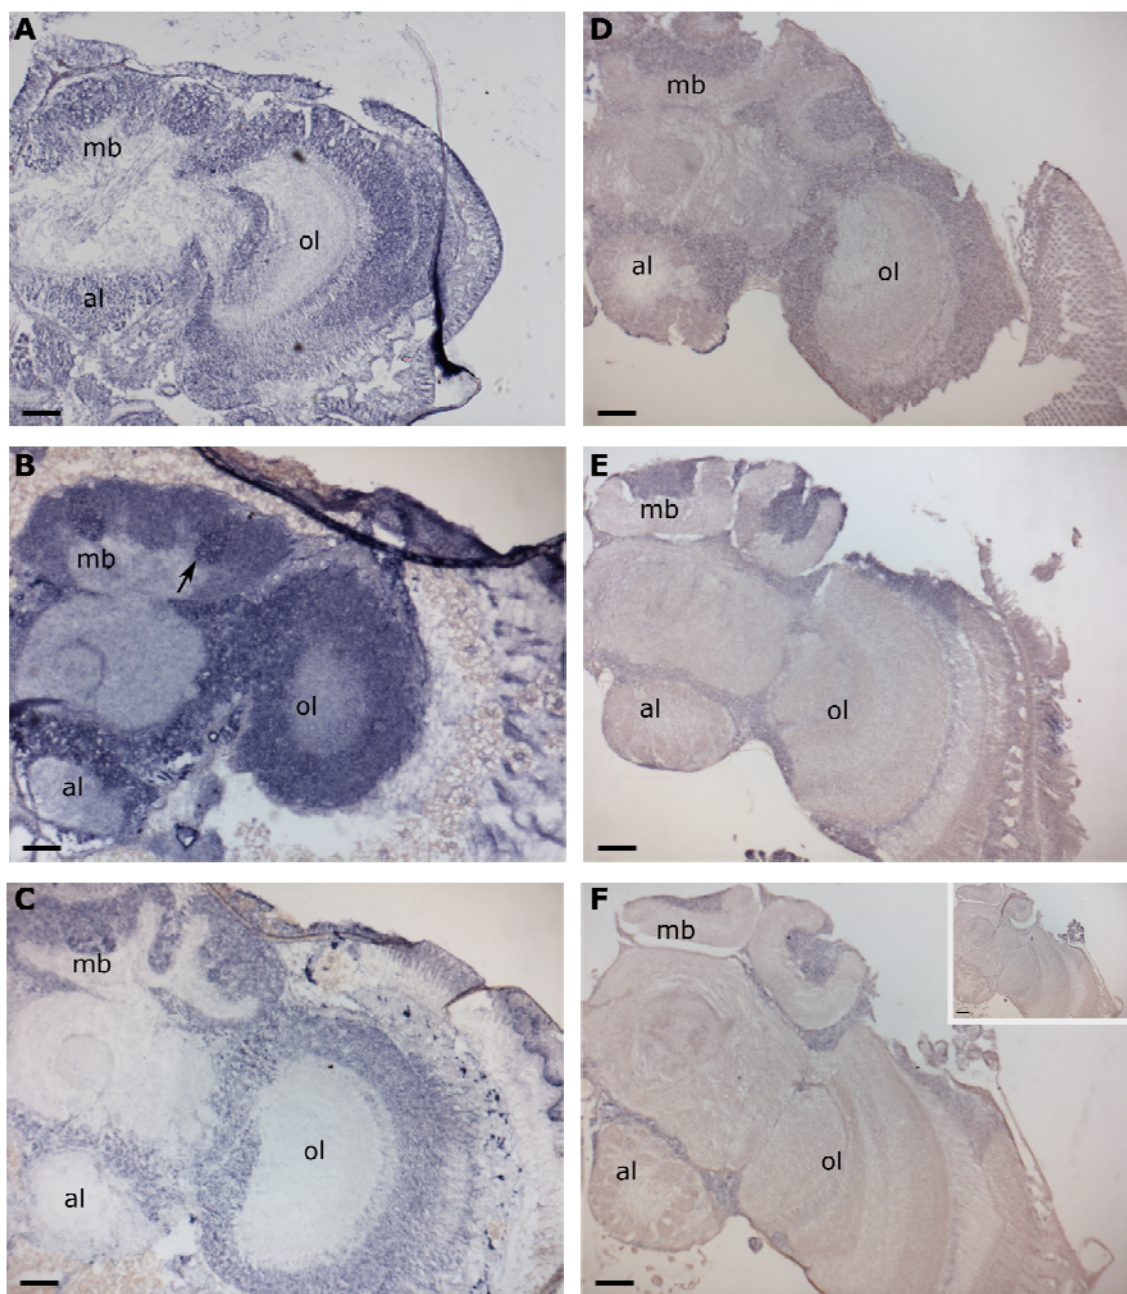

342

343 **Fig. 3** *In situ* hybridisation of *PRMT4* in the frontal half section of the brain of A) late larva/pre-pupa; B) early pupa;

344 C) mid-pupa; D) late pupa; E) two-day old worker and F) 7 to 10-day old worker. Three biological replicates were

345 analysed for each stage. Arrow: higher expression region. mb: mushroom body; ol: optic lobe; al: antennal lobe. F) inset

346 panel shows sense control without signal. Scale bars: 120  $\mu$ m.

347



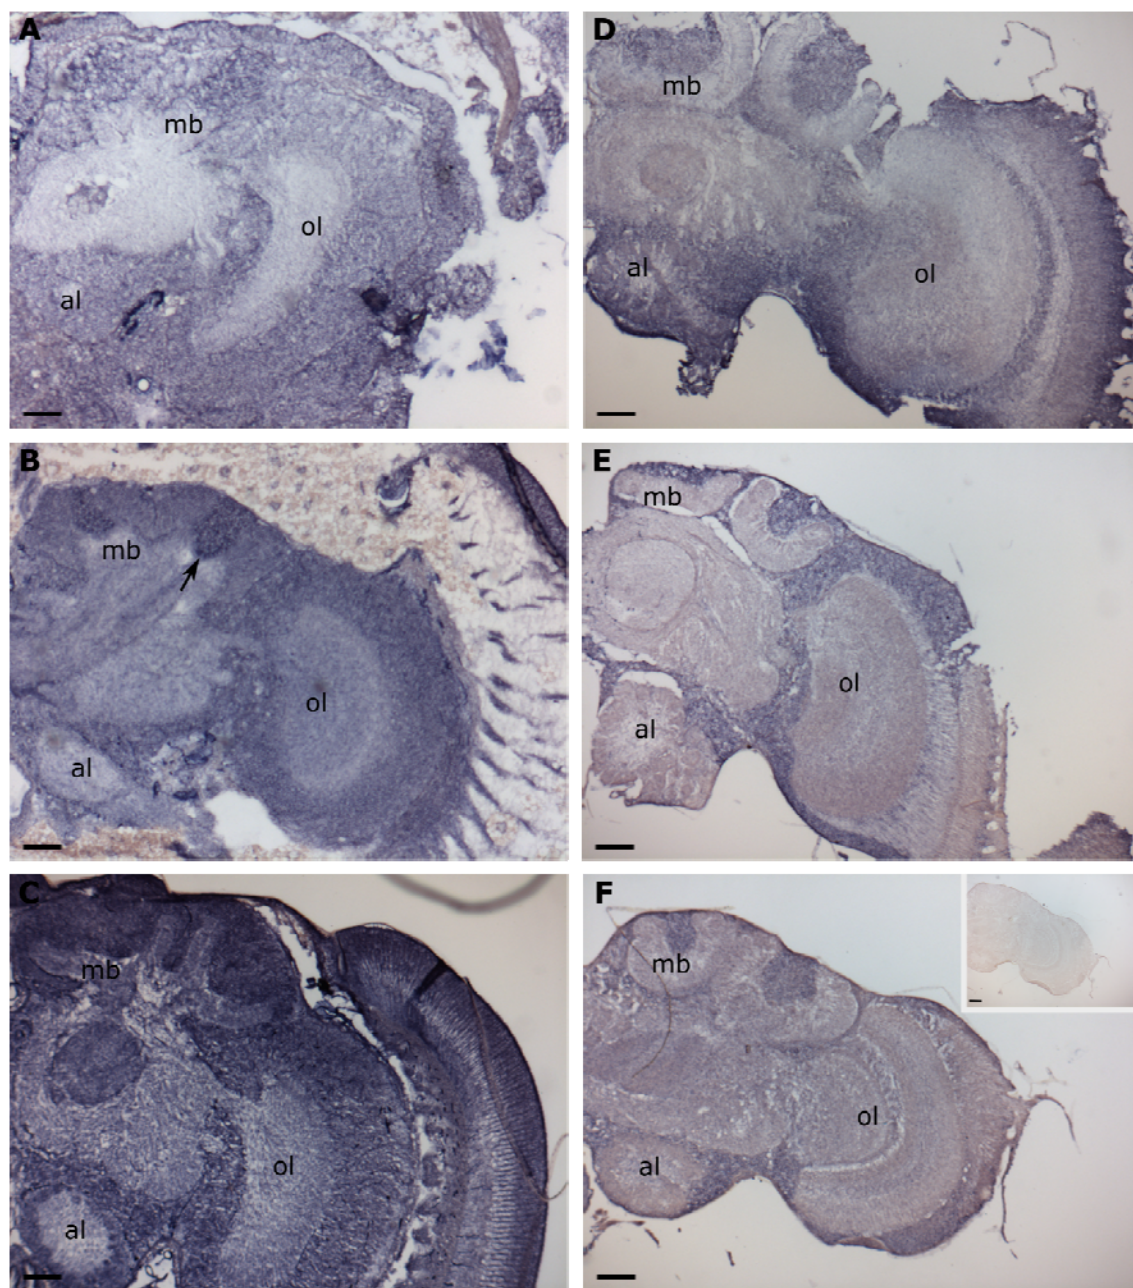

348

349

**Fig. 4** *In situ* hybridisation of *PRMT5* in the frontal half section of the brain of A) late larva/pre-pupa; B) early pupa;

350

**C) mid-pupa; D) late pupa; E) two-day old worker and F) 7 to 10-day old worker.** Three biological replicates were

351

analysed for each stage. Arrow: higher expression region. mb: mushroom body; ol: optic lobe; al: antennal lobe. F) inset

352

panel shows sense control without signal. Scale bars: 120 µm.

353

354

355 **Quantification of *PRMT1* expression as revealed by mRNA *in situ* hybridisation**

356 We noticed that *PRMT1* mRNA was preferentially expressed in the central mushroom body  
357 regions in pre-, early and mid-pupal stages (Fig. 2A, B and C), at the time when neurogenesis occurs  
358 in the honeybee [1]. Given the importance of central mushroom bodies for neuroblast/ganglion  
359 mother cell divisions we sought to quantify the relative expression level of *PRMT1* mRNA within  
360 different selected regions of the CNS. To this end, we measured the optical density of 24 areas of the  
361 CNS grouped into 4 anatomical regions (Fig. 5A and B and see also Materials and Methods). For the  
362 early pupal stage an additional high intensity sub-region of the antennal lobe was also chosen and  
363 analysed. The results are shown in Fig 5C. *PRMT1* expression was higher in the central mushroom  
364 body areas and a sub area of the antennal lobe than in other areas during the late larvae/pre-pupae,  
365 early pupae and mid-pupae developmental stages. The higher *PRMT1* mRNA expression level within  
366 these areas of mushroom bodies and antennal lobe during these developmental stages suggests that  
367 there may be a functional significance to this higher level of expression.

368



382 **High levels of *PRMT1* expression are found in areas of mitotically active cells within the**  
383 **mushroom bodies**

384 *PRMT1* was preferentially expressed in the centre of the mushroom bodies, the area which is  
385 recognised as a region containing dividing neuroblasts and ganglion mother cells from larval to mid-  
386 pupal stages in honeybees [1, 13, 14]. Therefore, we investigated whether the same anatomical areas  
387 also contain dividing cells in bumblebees. To this end, we used an antibody that marks mitotically  
388 active cells to co-immunolabel sections of the bumblebee brains used for ISH analysis of *PRMT1*  
389 mRNA expression to determine if higher levels of *PRMT1* mRNA correlate with the prevalence of  
390 mitotically active cells. The antibody against phosphorylated serine 10 on histone H3 (PH3S10) is  
391 specific for the metaphase and anaphase stages of mitotically active cells [53]. We found a significant  
392 number of cells within the mushroom bodies of the late larva/pre-pupa, early pupa, and mid- pupa  
393 regions, shown by ISH to have higher expression of *PRMT1*, to be mitotically active (Fig. 6M-O).  
394 The observed number of mitotically active cells is likely to underestimate the total number of  
395 dividing cells because PH3S10 only marks the metaphase and anaphase stages of the cell cycle [53].

396 In contrast, in late pupal and adult stages investigated here, there was a more uniform  
397 expression pattern of *PRMT1*, and we did not detect any cells expressing PH3S10 (Supplementary Fig.  
398 S2). These observations suggest that there were no dividing cells in the adult brain, consistent with  
399 previous observations that demonstrated the absence of adult neurogenesis in honeybees [1, 13, 54].

400



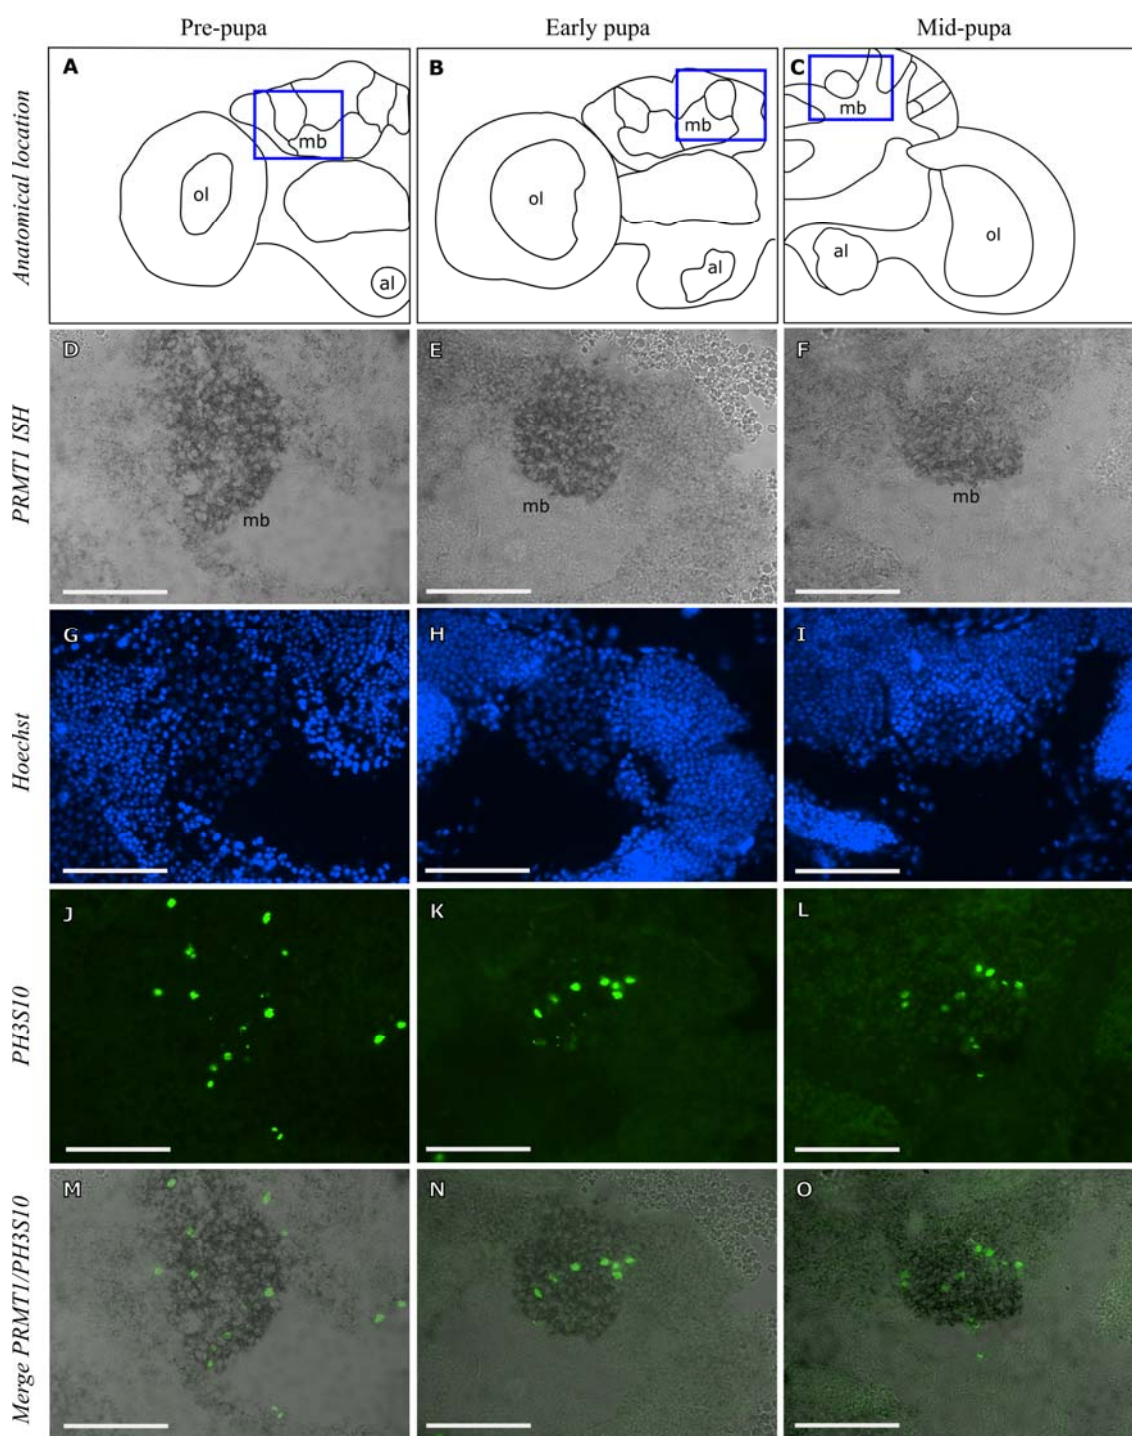

401

402 **Fig. 6** Areas of high *PRMT1* mRNA expression are enriched for dividing cells in the late larval/pre-pupal, early pupal  
403 and late pupal brain. A-C) Schematic diagrams of the late larval/pre-pupal, early pupal and late pupal brains showing the  
404 anatomical location of the mushroom bodies analysed in this study. D-F) *In situ* hybridisation of *PRMT1* in the late  
405 larval/pre-pupal, early pupal and late pupal mushroom bodies. G-I) Hoechst detection of all nuclei in the late larval/pre-pupal,  
406 early pupal and late pupal mushroom bodies. J-L) Immunohistochemical detection of mitotically active cells with anti-

407 phospho-histone H3 Ser 10 antibody in the late larval/pre-pupal, early pupal and late pupal mushroom bodies. M-O) Merged  
408 image of *PRMT1* expression and phospho-histone H3 Ser 10 immunoreactivity in the late larval/pre-pupal, early pupal and  
409 late pupal mushroom bodies. mb: mushroom body; ol: optic lobe; al: antennal lobe. Boxes indicate the anatomic location of  
410 the mushroom bodies analysed in this study. Scale bars: 100  $\mu$ m.

411

### 412 **Higher *PRMT1* expression correlates with mitotically active cells and lower cell density in the** 413 **mushroom bodies**

414 We quantified the relationship between higher expression of *PRMT1* and the prevalence of  
415 mitotically active cells (detected by PH3S10 immunoreactivity) within the central sub-regions of  
416 mushroom body areas in late larvae/pre-pupae, early pupae and mid-pupae. Spearman's rank  
417 correlation coefficient was used to investigate the correlation between the expression level of *PRMT1*  
418 and the proportion of mitotically active cells (the number of PH3S10 expressing cells divided by the  
419 total number of cells as determined by the number of nuclei labelled with Hoechst) for each stage.  
420 Results presented in Fig. 7B and C showed that there was a positive correlation (Fig. 7B:  $\rho = 0.46$ , df  
421 = 43, p-value = 0.0015; C:  $\rho = 0.46$ , df = 43, p-value = 0.0015) between the proportion of mitotically  
422 active cells within a region and the level of *PRMT1* expression in that region of mushroom bodies  
423 during early and mid-pupal stages. The correlation in late larval/pre-pupal stage was weaker and not  
424 significant (Fig. 7A:  $\rho = 0.22$ , df = 43, p-value = 0.14), although the co-immunolabelling of *PRMT1*  
425 ISH and PH3S10 immunohistochemistry (Fig. 6M) showed that the PH3S10 positive cells were  
426 within or close to the stronger *PRMT1* ISH signal region in the central mushroom body area.

427 These results show that in the central mushroom body areas, at least during the early- and  
428 mid-pupae stages, high levels of *PRMT1* expression are spatially-associated with increased mitotic  
429 activity.

430

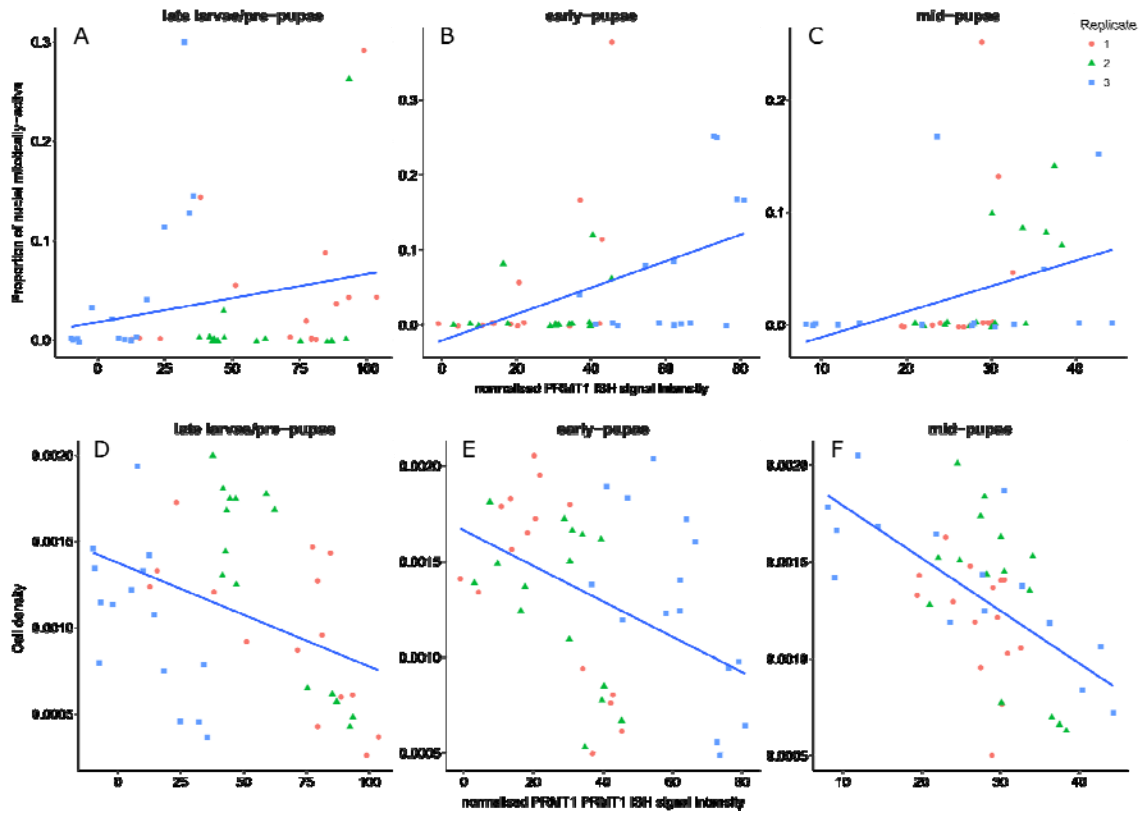

431  
432

433 **Fig. 7 Correlation analysis of *PRMT1* expression levels and PH3S10 positive cells and cell density.** A-C) Correlation  
 434 between the normalised optical density of *PRMT1* ISH signals (X axis) and proportion of mitotically active cells (the number  
 435 of PH3S10 expressing cells divided by the total number of cells as determined by the number of nuclei labelled with Hoechst,  
 436 Y axis) in each selected region for three different stages of bees. A) 3 late larvae/pre-pupae, B) 3 early pupae and C) 3 mid-  
 437 pupae. There is a moderately significant correlation between the higher proportion of dividing cells and higher expressed  
 438 level of *PRMT1* for B) early pupae,  $\rho = 0.46$ ,  $df = 43$ ,  $p$ -value = 0.0015 and C) mid-pupae,  $\rho = 0.46$ ,  $df = 43$ ,  $p$ -value =  
 439 0.0015. There is no significant correlation for A) late larvae/pre-pupae,  $\rho = 0.22$ ,  $df = 43$ ,  $p$ -value > 0.14. The dots which are  
 440 close to 0 value on the Y axis indicate that in these selected regions, there are no PH3S10 expressing cells. D-F) Correlation  
 441 between the normalised optical density of *PRMT1* ISH signals (X axis) and cell density (total number of Hoechst stained  
 442 nuclei divided by the size of the region, Y axis) in each selected region for three different stages of bees, D) 3 late larvae/pre-  
 443 pupae, E) 3 early pupae and F) 3 mid-pupae. There is a stronger significant correlation between lower cell density with  
 444 higher expressed level of *PRMT1* for all three developmental stages: D) late larvae/pre-pupae,  $\rho = -0.37$ ,  $df = 43$ ,  $p$ -value =  
 445 0.013; E) early pupae  $\rho = -0.4$ ,  $df = 43$ ,  $p$ -value = 0.0056; F) mid-pupae,  $\rho = -0.57$ ,  $df = 43$ ,  $p$ -value =  $5.9 \times 10^{-5}$ . Each dot  
 446 corresponds to the values of each selected region. The blue line is best linear fit line.

447



448           In analysing Hoechst stained images, we noticed that there were fewer nuclei in the central  
449 region of the mushroom bodies than in the outer regions of the mushroom bodies (Fig. 6G-I). In order  
450 to confirm this observation, we analysed and quantified the cell density in each region of interest.  
451 Results from Fig. 7D, E and F demonstrate that regions which show higher expression of *PRMT1*  
452 within the mushroom bodies correlated with the regions showing lower cell density (late larvae/pre-  
453 pupae/D:  $\rho = -0.37$ ,  $df = 43$ ,  $p\text{-value} = 0.013$ ; early pupae/E:  $\rho = -0.4$ ,  $df = 43$ ,  $p\text{-value} = 0.0056$ ; mid-  
454 pupae/F:  $\rho = -0.57$ ,  $df = 43$ ,  $p\text{-value} = 5.9 * 10^{-5}$ ). It is well documented that neuroblasts in the  
455 honeybee and *Drosophila* have bigger cell bodies than differentiated neurons, which may account for  
456 a lower cell density we observed in the areas of mitotic activity [1, 55, 56]. We have already shown  
457 that regions containing high *PRMT1* expression are associated with mitotically active cells. Our  
458 observation that the cell density is reduced within this part of MB further suggests that this region  
459 probably contains dividing neuroblasts [1, 13, 14].

460

## 461 **Discussion**

462           In the present study, we began to investigate the roles of PRMTs in the CNS development of  
463 bumblebees by analysing the expression pattern of several *PRMT* genes in the developing brain of  
464 these insects. We found that all three *PRMTs* investigated are expressed in the developing CNS of  
465 bumblebees. The widespread expression of these genes in bumblebee brains at all developmental  
466 stages investigated suggests that they may be important throughout the life cycle of the bumblebee.  
467 Previous research into the function of PRMTs in several model organisms highlighted the multitude of  
468 processes controlled by these enzymes, such as regulation of RNA processing, DNA damage repair  
469 and signal transduction, but also their important roles in the control of neural stem cell (NSC)  
470 proliferation and homeostasis, both during development and in the adult [21, 22, 24, 45]. Our findings  
471 that the *PRMTs* are expressed throughout the life cycle of bumblebees are thus consistent with the  
472 observations from other model organisms.

473           Interestingly, we found that *PRMT1* was particularly highly expressed in the central  
474 mushroom body regions, which have been identified in honeybees as regions containing dividing  
475 neuroblasts/ganglion mother cells. Whilst it is not certain that areas of high *PRMT1* expression levels  
476 in the bumblebee also contain dividing neuroblasts/ganglion mother cells, such a possibility is  
477 plausible and supported by the observation that high levels of *PRMT1* expression show significant  
478 spatial correlation with the mitotic marker, PH3S10, during early and mid-pupal stages. Moreover, we  
479 observed that higher levels of *PRMT1* expression within the central mushroom body showed  
480 significant spatial correlation with regions of lower cell density. Neuroblasts in the honeybee and  
481 *Drosophila* have bigger cell bodies than differentiated neurons, which may account for the lower cell  
482 density we observed in the areas of high *PRMT1* expression characterised by the presence of mitotic  
483 activity [1, 55, 56].

484           These observations are intriguing given the developmental programmes taking place within  
485 the bumblebee mushroom bodies during these stages. While there is very little information about  
486 these processes in bumblebees, more is known about the developmental fates of neuroblasts in the  
487 mushroom bodies of honeybees and in *Drosophila*. Larval development in honeybees is characterised

488 by an increase in neuroblast numbers initially, with ganglion mother cells and Kenyon cells being  
489 born towards the later larval stages until mid-late pupal stages [1]. It is noteworthy in this respect that  
490 in our study we found that in the late larval/pre-pupal stage the correlation between the level of  
491 *PRMT1* expression and the number of mitotic cells was weak, while it became stronger during the  
492 early- and mid-pupal stages. These stages correspond to two developmental events in the honeybee  
493 [1]. Firstly, during the late-larval stage the neuroblast and ganglion mother cell numbers remain high  
494 as Kenyon cells are born, suggesting a balance between proliferative and neurogenic divisions.  
495 Secondly during the early- and mid-pupal stages neuroblast and ganglion mother cell numbers  
496 decrease, whilst Kenyon cells rapidly increase in number, suggesting that neurogenic divisions  
497 predominate (See Fig. 1B) [1]. Later in development, from the mid-late pupal stage, the neuroblasts  
498 are removed by apoptosis and neurogenesis stops [1].

499 These observations suggest that high levels of *PRMT1* may favour neurogenic divisions of  
500 neuroblasts and ganglion mother cells to generate ganglion mother cells and Kenyon cells,  
501 respectively. This idea is further supported by the observations of mammalian cortical development,  
502 where neural stem cells that are undergoing neurogenic division to either generate intermediate basal  
503 progenitors (IBPs) or IBPs dividing to generate two neurons express high levels of the anti-  
504 proliferative gene *TIS21/BTG2*, that stimulates the activity of *PRMT1* [40]. Importantly, a *TIS21*  
505 orthologue is also present in bumblebees (accession number: LOC100648380; *BTG2*). Thus, the  
506 *TIS21/PRMT1* axis may form part of a general mechanism controlling neurogenic divisions during  
507 development of a variety of animal species. It will be important to probe this possibility further in  
508 future studies.

509 In the present study we did not detect any mitotically-active cells in the late pupae and adult  
510 stages, suggesting that in the mushroom bodies of bumblebees, neurogenesis ceases during pupal  
511 development. These observations align well with previous work in honeybees, which showed that  
512 developmental neurogenesis ceases in the mushroom bodies after the mid-pupal stage, as manifested  
513 by an absence of detectable mitotically-active neuroblasts and ganglion mother cells [1, 13, 14, 57].

514 We cannot, however, fully exclude the possibility that adult neurogenesis may occur in  
515 bumblebees in particular situations such as brain damage as it has been observed in other insects. For  
516 example, in crickets (*Acheta domesticus*), neurogenesis in mushroom body also takes place in the  
517 adult [58]. In addition, in the medulla cortex of optic lobes of *Drosophila*, adult neurogenesis occurs  
518 as well [59]. Acute brain damage to the *Drosophila* medulla cortex triggers adult neurogenesis [59].  
519 Investigating the possibility of such regulated adult neurogenesis in bees is an interesting goal for  
520 future work.

521 The *PRMT4* and *PRMT5* *in situ* hybridisation results revealed a more uniform expression of  
522 both mRNAs at late larval/pre-pupal, mid- and late- pupal and adult stages. We observed a slightly  
523 stronger ISH signal in the proliferative regions of mushroom bodies in early-pupal stages for both  
524 *PRMT4* and 5 mRNAs. Interestingly, PRMT4 induces PC12 cell proliferation by methylating the  
525 RNA binding protein HuD, and inducing degradation of anti-proliferative *p21* mRNA bound by HuD  
526 [42]. PRMT5 also maintains proliferation of PC12 cells and mouse embryonic neural stem cells  
527 during early stages of development [43-45]. PRMT5 is also required for NSC homeostasis, and its  
528 selective depletion in CNS in mice leads to CNS developmental defects and post-natal death within 14  
529 days after birth [45]. Furthermore, *PRMT5* expression is upregulated in solid tumors, lymphoma, and  
530 leukemia [21]. Together, these observations suggest that PRMT5 may be required for maintaining  
531 cells in a proliferative state. It will be important to investigate whether PRMT5 plays a similar role in  
532 the early pupal stage in bumblebees in the future. Functional molecular studies have historically been  
533 difficult in bumblebees due to lack of genetic tools such as mutants. However new CRISPR/Cas gene  
534 editing technology has recently been applied to insects including ants and honeybees [60, 61]. The  
535 current work paves the way for such a functional study of PRMT function in bumblebees by defining  
536 the localisation and timing of *PRMT* gene expression in the brains of bumblebees.

537

538

539 **Data accessibility.** Raw data for Fig. 5 and 7 are provided in supplementary table S1 and S2.

540 **Author Contributions.** CG, AC and LC conceived the study. CG, AC, CJP and LC designed the  
541 study; AC, LC, ME provided technical support and advice for histology, mRNA *in situ* hybridisation,  
542 immunohistochemistry and photomicroscopy; CG performed experiments; CG and CJP analysed data;  
543 CG, AC, CJP and LC drafted the manuscript. All authors approved the manuscript.

544 **Competing Interests.** The authors declare that they have no competing interests.

545 **Funding.** CG was supported by a studentship from the China Scholarship Council No. 201408360067,  
546 AC was supported by the BBSRC grant BB/J006602/1. LC received support from HFSP program  
547 grant (RGP0022/2014).

548 **Acknowledgments.** We thank Maurice Elphick for providing access to research facilities in his  
549 laboratory and for providing feedback on the manuscript. We also thank Angelika Stollewerk, Petra  
550 Ungerer, Frederick Partridge, Thomas Butts and Weigang Cai for helpful discussions.

551

552

553 **References**

- 554 1 Farris, S., Robinson, G., Davis, R., Fahrbach, S. 1999 Larval and pupal development of the  
555 mushroom bodies in the honey bee, *Apis mellifera*. *Journal of Comparative Neurology*. **414**, 97-113.
- 556 2 Held, M., Berz, A., Hensgen, R., Muenz, T. S., Scholl, C., Rössler, W., Homberg, U., Pfeiffer, K. 2016  
557 Microglomerular synaptic complexes in the sky-compass network of the honeybee connect parallel  
558 pathways from the anterior optic tubercle to the central complex. *Frontiers in behavioral  
559 neuroscience*. **10**, 186.
- 560 3 Plath, J. A., Entler, B. V., Kirkerud, N. H., Schlegel, U., Galizia, C. G., Barron, A. B. 2017 Different  
561 Roles for Honey Bee Mushroom Bodies and Central Complex in Visual Learning of Colored Lights in  
562 an Aversive Conditioning Assay. *Frontiers in behavioral neuroscience*. **11**, 98.
- 563 4 Neuser, K., Triphan, T., Mronz, M., Poeck, B., Strauss, R. 2008 Analysis of a spatial orientation  
564 memory in *Drosophila*. *Nature*. **453**, 1244.
- 565 5 Pan, Y., Zhou, Y., Guo, C., Gong, H., Gong, Z., Liu, L. 2009 Differential roles of the fan-shaped body  
566 and the ellipsoid body in *Drosophila* visual pattern memory. *Learning & Memory*. **16**, 289-295.
- 567 6 Hanstrom, B. 1928 Vergleichende Anatomie des Nervensystems der wirbellosen Tiere.
- 568 7 Bullock, T., Horridge, G. A. 1965 Structure and function in the nervous systems of invertebrates.
- 569 8 Chittka, L., Niven, J. 2009 Are bigger brains better? *Current biology*. **19**, R995-R1008.
- 570 9 Heisenberg, M. 1998 What do the mushroom bodies do for the insect brain? An introduction.  
571 *Learning & Memory*. **5**, 1-10.
- 572 10 Li, L., Su, S., Perry, C. J., Elphick, M. R., Chittka, L., Søvik, E. 2018 Large-scale transcriptome  
573 changes in the process of long-term visual memory formation in the bumblebee, *Bombus terrestris*.  
574 *Scientific reports*. **8**, 534.
- 575 11 Rybak, J., Menzel, R. 2010 Mushroom body of the honeybee. *Handbook of brain microcircuits*.  
576 433-438.
- 577 12 Kenyon, F. 1896 The brain of the bee. A preliminary contribution to the morphology of the  
578 nervous system of the Arthropoda. *Journal of Comparative Neurology*. **6**, 133-210.
- 579 13 Kurshan, P. T., Hamilton, I. S., Mustard, J. A., Mercer, A. R. 2003 Developmental changes in  
580 expression patterns of two dopamine receptor genes in mushroom bodies of the honeybee, *Apis  
581 mellifera*. *Journal of Comparative Neurology*. **466**, 91-103.
- 582 14 Malun, D. 1998 Early development of mushroom bodies in the brain of the honeybee *Apis  
583 mellifera* as revealed by BrdU incorporation and ablation experiments. *Learning & memory*. **5**, 90-  
584 101.
- 585 15 Homem, C. C., Knoblich, J. A. 2012 *Drosophila* neuroblasts: a model for stem cell biology.  
586 *Development*. **139**, 4297-4310.
- 587 16 Kunz, T., Kraft, K. F., Technau, G. M., Urbach, R. 2012 Origin of *Drosophila* mushroom body  
588 neuroblasts and generation of divergent embryonic lineages. *Development*. dev. 077883.
- 589 17 Farris, S. M., Robinson, G. E., Fahrbach, S. E. 2001 Experience-and age-related outgrowth of  
590 intrinsic neurons in the mushroom bodies of the adult worker honeybee. *Journal of Neuroscience*. **21**,  
591 6395-6404.
- 592 18 Ganeshina, O., Schäfer, S., Malun, D. 2000 Proliferation and programmed cell death of neuronal  
593 precursors in the mushroom bodies of the honeybee. *Journal of Comparative Neurology*. **417**, 349-  
594 365.
- 595 19 Malun, D., Moseleit, A. D., Grünewald, B. 2003 20-hydroxyecdysone inhibits the mitotic activity  
596 of neuronal precursors in the developing mushroom bodies of the honeybee, *Apis mellifera*. *Journal  
597 of neurobiology*. **57**, 1-14.
- 598 20 Krause, C. D., Yang, Z.-H., Kim, Y.-S., Lee, J.-H., Cook, J. R., Pestka, S. 2007 Protein arginine  
599 methyltransferases: evolution and assessment of their pharmacological and therapeutic potential.  
600 *Pharmacology & therapeutics*. **113**, 50-87.
- 601 21 Blanc, R. S., Richard, S. 2017 Arginine methylation: the coming of age. *Molecular cell*. **65**, 8-24.

- 602 22 Bedford, M. T., Clarke, S. G. 2009 Protein arginine methylation in mammals: who, what, and why.  
603 *Molecular cell*. **33**, 1-13.
- 604 23 Wang, Y. C., Li, C. 2012 Evolutionarily conserved protein arginine methyltransferases in non-  
605 mammalian animal systems. *FEBS Journal*. **279**, 932-945.
- 606 24 Blackwell, E., Ceman, S. 2012 Arginine methylation of RNA-binding proteins regulates cell  
607 function and differentiation. *Molecular reproduction and development*. **79**, 163-175.
- 608 25 Hirota, K., Shigekawa, C., Araoi, S., Sha, L., Inagawa, T., Kanou, A., Kako, K., Daitoku, H., Fukamizu,  
609 A. 2017 Simultaneous ablation of prmt-1 and prmt-5 abolishes asymmetric and symmetric arginine  
610 dimethylations in *Caenorhabditis elegans*. *The Journal of Biochemistry*. **161**, 521-527.
- 611 26 Kimura, S., Sawatsubashi, S., Ito, S., Kouzmenko, A., Suzuki, E., Zhao, Y., Yamagata, K., Tanabe, M.,  
612 Ueda, T., Fujiyama, S. 2008 *Drosophila* arginine methyltransferase 1 (DART1) is an ecdysone receptor  
613 co-repressor. *Biochemical and biophysical research communications*. **371**, 889-893.
- 614 27 Pawlak, M. R., Scherer, C. A., Chen, J., Roshon, M. J., Ruley, H. E. 2000 Arginine N-  
615 methyltransferase 1 is required for early postimplantation mouse development, but cells deficient in  
616 the enzyme are viable. *Molecular and cellular biology*. **20**, 4859-4869.
- 617 28 Takahashi, Y., Daitoku, H., Hirota, K., Tamiya, H., Yokoyama, A., Kako, K., Nagashima, Y.,  
618 Nakamura, A., Shimada, T., Watanabe, S. 2011 Asymmetric arginine dimethylation determines life  
619 span in *C. elegans* by regulating forkhead transcription factor DAF-16. *Cell metabolism*. **13**, 505-516.
- 620 29 Tee, W.-W., Pardo, M., Theunissen, T. W., Yu, L., Choudhary, J. S., Hajkova, P., Surani, M. A. 2010  
621 Prmt5 is essential for early mouse development and acts in the cytoplasm to maintain ES cell  
622 pluripotency. *Genes & development*. **24**, 2772-2777.
- 623 30 Yadav, N., Lee, J., Kim, J., Shen, J., Hu, M. C.-T., Aldaz, C. M., Bedford, M. T. 2003 Specific protein  
624 methylation defects and gene expression perturbations in coactivator-associated arginine  
625 methyltransferase 1-deficient mice. *Proceedings of the National Academy of Sciences*. **100**, 6464-  
626 6468.
- 627 31 Simandi, Z., Czipa, E., Horvath, A., Koszeghy, A., Bordas, C., Póliska, S., Juhász, I., Imre, L., Szabó,  
628 G., Dezso, B. 2015 PRMT1 and PRMT8 Regulate Retinoic Acid-Dependent Neuronal Differentiation  
629 with Implications to Neuropathology. *Stem cells*. **33**, 726-741.
- 630 32 Hein, K., Mittler, G., Cizelsky, W., Kühl, M., Ferrante, F., Liefke, R., Berger, I. M., Just, S., Sträng, J.  
631 E., Kestler, H. A. 2015 Site-specific methylation of Notch1 controls the amplitude and duration of the  
632 Notch1 response. *Sci. Signal*. **8**, ra30-ra30.
- 633 33 Selvi, B. R., Swaminathan, A., Maheshwari, U., Nagabhushana, A., Mishra, R. K., Kundu, T. K. 2015  
634 CARM1 regulates astroglial lineage through transcriptional regulation of Nanog and  
635 posttranscriptional regulation by miR92a. *Molecular biology of the cell*. **26**, 316-326.
- 636 34 Huang, J., Vogel, G., Yu, Z., Almazan, G., Richard, S. 2011 Type II arginine methyltransferase  
637 PRMT5 regulates gene expression of inhibitors of differentiation/DNA binding Id2 and Id4 during glial  
638 cell differentiation. *Journal of Biological Chemistry*. **286**, 44424-44432.
- 639 35 Miyata, S., Mori, Y., Tohyama, M. 2008 PRMT1 and Btg2 regulates neurite outgrowth of Neuro2a  
640 cells. *Neuroscience letters*. **445**, 162-165.
- 641 36 Batut, J., Vandel, L., Leclerc, C., Daguzan, C., Moreau, M., Néant, I. 2005 The Ca<sup>2+</sup>-induced  
642 methyltransferase xPRMT1b controls neural fate in amphibian embryo. *Proceedings of the National  
643 Academy of Sciences of the United States of America*. **102**, 15128-15133.
- 644 37 Lin, W.-J., Gary, J. D., Yang, M. C., Clarke, S., Herschman, H. R. 1996 The mammalian immediate-  
645 early TIS21 protein and the leukemia-associated BTG1 protein interact with a protein-arginine N-  
646 methyltransferase. *Journal of Biological Chemistry*. **271**, 15034-15044.
- 647 38 Iacopetti, P., Michelini, M., Stuckmann, I., Oback, B., Aaku-Saraste, E., Huttner, W. B. 1999  
648 Expression of the antiproliferative gene TIS21 at the onset of neurogenesis identifies single  
649 neuroepithelial cells that switch from proliferative to neuron-generating division. *Proceedings of the  
650 National Academy of Sciences*. **96**, 4639-4644.

- 651 39 Canzoniere, D., Farioli-Vecchioli, S., Conti, F., Ciotti, M. T., Tata, A. M., Augusti-Tocco, G., Mattei,  
652 E., Lakshmana, M. K., Krizhanovsky, V., Reeves, S. A. 2004 Dual control of neurogenesis by PC3  
653 through cell cycle inhibition and induction of Math1. *Journal of Neuroscience*. **24**, 3355-3369.
- 654 40 Haubensak, W., Attardo, A., Denk, W., Huttner, W. B. 2004 Neurons arise in the basal  
655 neuroepithelium of the early mammalian telencephalon: a major site of neurogenesis. *Proceedings*  
656 *of the National Academy of Sciences of the United States of America*. **101**, 3196-3201.
- 657 41 Greene, L. A., Tischler, A. S. 1976 Establishment of a noradrenergic clonal line of rat adrenal  
658 pheochromocytoma cells which respond to nerve growth factor. *Proceedings of the National*  
659 *Academy of Sciences*. **73**, 2424-2428.
- 660 42 Fujiwara, T., Mori, Y., Chu, D. L., Koyama, Y., Miyata, S., Tanaka, H., Yachi, K., Kubo, T., Yoshikawa,  
661 H., Tohyama, M. 2006 CARM1 regulates proliferation of PC12 cells by methylating HuD. *Molecular*  
662 *and cellular biology*. **26**, 2273-2285.
- 663 43 Chittka, A. 2013 Differential regulation of SC1/PRDM4 and PRMT5 mediated protein arginine  
664 methylation by the nerve growth factor and the epidermal growth factor in PC12 cells. *Neuroscience*  
665 *letters*. **550**, 87-92.
- 666 44 Chittka, A., Nitarska, J., Grazini, U., Richardson, W. D. 2012 Transcription Factor Positive  
667 Regulatory Domain 4 (PRDM4) Recruits Protein Arginine Methyltransferase 5 (PRMT5) to Mediate  
668 Histone Arginine Methylation and Control Neural Stem Cell Proliferation and Differentiation. *Journal*  
669 *of Biological Chemistry*. **287**, 42995-43006. (10.1074/jbc.M112.392746)
- 670 45 Bezzi, M., Teo, S. X., Muller, J., Mok, W. C., Sahu, S. K., Vardy, L. A., Bonday, Z. Q., Guccione, E.  
671 2013 Regulation of constitutive and alternative splicing by PRMT5 reveals a role for Mdm4 pre-  
672 mRNA in sensing defects in the spliceosomal machinery. *Genes & development*. **27**, 1903-1916.
- 673 46 Oliver E. Prÿs-Jones, S. A. C. 2003 *Bumblebees*. The Richmond Publishing Co. Ltd.
- 674 47 Stolle, E., Wilfert, L., Schmid-Hempel, R., Schmid-Hempel, P., Kube, M., Reinhardt, R., Moritz, R. F.  
675 2011 A second generation genetic map of the bumblebee *Bombus terrestris* (Linnaeus, 1758) reveals  
676 slow genome and chromosome evolution in the Apidae. *Bmc Genomics*. **12**, 48.
- 677 48 Riveros, A. J., Gronenberg, W. 2010 Brain allometry and neural plasticity in the bumblebee  
678 *Bombus occidentalis*. *Brain, behavior and evolution*. **75**, 138-148.
- 679 49 Jay, S. C. 1962 Colour changes in honeybee pupae. *Bee World*. **43**, 119-122.
- 680 50 Pouvreau, A. 1989 Contribution à l'étude du polyéthisme chez les bourdons, *Bombus*  
681 *Latr.*(Hymenoptera, Apidae). *Apidologie*. **20**, 229-244.
- 682 51 Schindelin, J., Arganda-Carreras, I., Frise, E., Kaynig, V., Longair, M., Pietzsch, T., Preibisch, S.,  
683 Rueden, C., Saalfeld, S., Schmid, B. 2012 Fiji: an open-source platform for biological-image analysis.  
684 *Nature methods*. **9**, 676-682.
- 685 52 R Core Team. R: A language and environment for statistical computing. 2017 [cited; Available  
686 from: <https://www.R-project.org/>
- 687 53 Giet, R., Glover, D. M. 2001 *Drosophila* aurora B kinase is required for histone H3  
688 phosphorylation and condensin recruitment during chromosome condensation and to organize the  
689 central spindle during cytokinesis. *The Journal of cell biology*. **152**, 669-682.
- 690 54 Fahrbach, S. E., Strande, J. L., Robinson, G. E. 1995 Neurogenesis is absent in the brains of adult  
691 honey bees and does not explain behavioral neuroplasticity. *Neuroscience letters*. **197**, 145-148.
- 692 55 Homem, C. C., Steinmann, V., Burkard, T. R., Jais, A., Esterbauer, H., Knoblich, J. A. 2014 Ecdysone  
693 and mediator change energy metabolism to terminate proliferation in *Drosophila* neural stem cells.  
694 *Cell*. **158**, 874-888.
- 695 56 Siegrist, S. E., Haque, N. S., Chen, C.-H., Hay, B. A., Hariharan, I. K. 2010 Inactivation of both Foxo  
696 and reaper promotes long-term adult neurogenesis in *Drosophila*. *Current Biology*. **20**, 643-648.
- 697 57 Roat, T. C., da Cruz Landim, C. 2010 Differences in mushroom bodies morphogenesis in workers,  
698 queens and drones of *Apis mellifera*: Neuroblasts proliferation and death. *Micron*. **41**, 382-389.
- 699 58 Cayre, M., Strambi, C., Strambi, A. 1994 Neurogenesis in an adult insect brain and its hormonal  
700 control. *Nature*. **368**, 57.



701 59 Fernández-Hernández, I., Rhiner, C., Moreno, E. 2013 Adult neurogenesis in *Drosophila*. *Cell*  
702 *reports*. **3**, 1857-1865.  
703 60 Kohno, H., Suenami, S., Takeuchi, H., Sasaki, T., Kubo, T. 2016 Production of Knockout Mutants by  
704 CRISPR/Cas9 in the European Honeybee, *Apis mellifera* L. *Zoological science*. **33**, 505-512.  
705 61 Yan, H., Opachaloemphan, C., Mancini, G., Yang, H., Gallitto, M., Mlejnek, J., Leibholz, A., Haight,  
706 K., Ghaninia, M., Huo, L. 2017 An engineered orco mutation produces aberrant social behavior and  
707 defective neural development in ants. *Cell*. **170**, 736-747. e739.  
708
